# Supplementary material
Source: publisher figshare collection journal article supplement (https://gsajournals.figshare.com/ndownloader/files/13507340)
Supplement: Supplementary file 1 [file 13507340]

**File S1. Supplementary References**

Baird S. E. and S. W. Emmons, 1990 Properties of a class of genes required for ray morphogenesis in Caenorhabditis elegans. Genetics 126:335-44.

Bokhove, M. and L. Jovine, 2018 Structure of Zona Pellucida Module Proteins. Curr Top Dev Biol 130**:** 413-442.

Duckert, P., S. Brunak and N. Blom, 2004 Prediction of proprotein convertase cleavage sites. Protein Eng Des Sel 17**:** 107-112.

Frand, A. R., S. Russel and G. Ruvkun, 2005 Functional genomic analysis of C. elegans molting. PLoS Biol 3**:** e312.

Gill, H. K., J. D. Cohen, J. Ayala-Figueroa, R. Forman-Rubinsky, C. Poggioli *et al.*, 2016 Integrity of Narrow Epithelial Tubes in the C. elegans Excretory System Requires a Transient Luminal Matrix. PLoS Genet 12**:** e1006205.

Hahn-Windgassen A. and M. R. Van Gilst, 2009 The Caenorhabditis elegans HNF4alpha Homolog, NHR-31, mediates excretory tube growth and function through coordinate regulation of the vacuolar ATPase. PLoS Genet. 5:e1000553.

Heiman, M. G. and S. Shaham, 2009 DEX-1 and DYF-7 establish sensory dendrite length by anchoring dendritic tips during cell migration. Cell 137**:** 344-355.

Kelley, M., J. Yochem, M. Krieg, A. Calixto, M. G. Heiman *et al.*, 2015 FBN-1, a fibrillin-related protein, is required for resistance of the epidermis to mechanical deformation during C. elegans embryogenesis. Elife 4.

Low, I. I. C., C. R. Williams, M. K. Chong, I. G. McLachlan, B. M. Wierbowski *et al.*, 2018 Morphogenesis of neurons and glia within an epithelium. bioRxiv.

Moretti, S., F. Armougom, I. M. Wallace, D. G. Higgins, C. V. Jongeneel *et al.*, 2007 The M-Coffee web server: a meta-method for computing multiple sequence alignments by combining alternative alignment methods. Nucleic Acids Res 35**:** W645-648.

Muriel, J. M., M. Brannan, K. Taylor, I. L. Johnstone, G. J. Lithgow *et al.*, 2003 M142.2 (cut-6), a novel Caenorhabditis elegans matrix gene important for dauer body shape. Dev Biol 260**:** 339-351.

Sapio, M. R., M. A. Hilliard, M. Cermola, R. Favre and P. Bazzicalupo, 2005 The Zona Pellucida domain containing proteins, CUT-1, CUT-3 and CUT-5, play essential roles in the development of the larval alae in Caenorhabditis elegans. Dev Biol 282**:** 231-245.

Sebastiano, M., F. Lassandro and P. Bazzicalupo, 1991 cut-1 a Caenorhabditis elegans gene coding for a dauer-specific noncollagenous component of the cuticle. Dev Biol 146**:** 519-530.

Starich T. A., R. K. Herman, C. K. Kari, W. H. Yeh, W. S. Schackwitz *et al.,* 1995 Mutations affecting the chemosensory neurons of Caenorhabditis elegans. Genetics 139:171-88.

Vuong-Brender, T. T. K., S. K. Suman and M. Labouesse, 2017 The apical ECM preserves embryonic integrity and distributes mechanical stress during morphogenesis. Development 144**:** 4336-4349.

Wallace, I. M., O. O'Sullivan, D. G. Higgins and C. Notredame, 2006 M-Coffee: combining multiple sequence alignment methods with T-Coffee. Nucleic Acids Res 34**:** 1692-1699.

Yu, R. Y., C. Q. Nguyen, D. H. Hall and K. L. Chow, 2000 Expression of ram-5 in the structural cell is required for sensory ray morphogenesis in Caenorhabditis elegans male tail. EMBO J 14:3542-55.
